# Supplementary material
Source: Research Square preprint supplement (doi:10.21203/rs.3.rs-9169352/v1)
Supplement: Supplementary file 1 [file 4b742b12690c7bf53da8e56c.xlsx]

## Sheet: Sheet1
						Table S1: Details of Public Datasets.					Table S2: Primer Sequences for Target lncRNAs in qPCR Validation
						Datasets	GSE164541	GSE109203			Gene	Forward primer (5'-3')	Reverse primer (5'-3')
						Published date	Aug 31, 2021	Dec 07, 2020			GAPDH	ATCACCATCTTCCAGGAGCGA	CCTTCTCCATGGTGGTGAAGAC
						Platforms	GPL16791	GPL11154			β-actin	AGGCCAACCGCGAGAAGATG	GCCAGAGGCGTACAGGGATA
						Organism	Homo sapiens	Homo sapiens			U6	CTCGCTTCGGCAGCACA	AACGCTTCACGAATTTGCGT
						Patients source	Guangzhou, China	Guangzhou, China			5S rRNA	GTCTACGGCCATACCACCCTGAA	AAGCCTACAGCACCCGGTATTCC
						Samples	5 CRC tissues with matched normal tissues, and adenomas	12 CRC tissues and 3 normal tissues			FOXP4-AS1	GTGAGCTTCTGGGTTCGACA	ATTGAGGGTTAGGGCAGCAC
											CRNDE	GCTGAAATTCATCCCAAGGCT	TCTCCTCCTTCCAATAGCCAGT
											UCA1	CCGAGAGCCGATCAGACAAA	TGGGATGGCCATTTGGAAGG
											SNHG17	AGTCATGTGCTGTTCCTGGG	TGAGACCCACGCAGATTTCC
